# Supplementary material for: Generation of a Biobank From Two Adult Thoroughbred Stallions for the Functional Annotation of Animal Genomes Initiative
Source: PubMed Central journal article supplement (PMC7982670; doi:10.3389/fgene.2021.650305), 2021-03-08
Supplement: Data_Sheet_1.pdf [file Data_Sheet_1.pdf]

**Table S1: List of tissues collected for two adult Thoroughbred stallions. Asterisk (\*) denotes tissues with nuclei isolated.**

|                                                                                                                                                                                                                                                                                                                                                                                                                                                                                                                                                                                                                                                                                                                                                                                                                                                                                                                                                                                                                                                                                                                         |                                                                                                                                                                                                                                                                                                                                                                                                                                                                                                                                                                                                                                                                                                                                                                                                                                                                                                                                                                                                                                                                                                                                                                                                                                                     |                                                                                                                                                                                                                                                                                                                                                                                                                                                                                                                                                                                                                                                                                                                                                                                                                                                                                                                                                                                                                                                                   |
|-------------------------------------------------------------------------------------------------------------------------------------------------------------------------------------------------------------------------------------------------------------------------------------------------------------------------------------------------------------------------------------------------------------------------------------------------------------------------------------------------------------------------------------------------------------------------------------------------------------------------------------------------------------------------------------------------------------------------------------------------------------------------------------------------------------------------------------------------------------------------------------------------------------------------------------------------------------------------------------------------------------------------------------------------------------------------------------------------------------------------|-----------------------------------------------------------------------------------------------------------------------------------------------------------------------------------------------------------------------------------------------------------------------------------------------------------------------------------------------------------------------------------------------------------------------------------------------------------------------------------------------------------------------------------------------------------------------------------------------------------------------------------------------------------------------------------------------------------------------------------------------------------------------------------------------------------------------------------------------------------------------------------------------------------------------------------------------------------------------------------------------------------------------------------------------------------------------------------------------------------------------------------------------------------------------------------------------------------------------------------------------------|-------------------------------------------------------------------------------------------------------------------------------------------------------------------------------------------------------------------------------------------------------------------------------------------------------------------------------------------------------------------------------------------------------------------------------------------------------------------------------------------------------------------------------------------------------------------------------------------------------------------------------------------------------------------------------------------------------------------------------------------------------------------------------------------------------------------------------------------------------------------------------------------------------------------------------------------------------------------------------------------------------------------------------------------------------------------|
| <p><u>Musculoskeletal</u><br/>           Cartilage</p> <ul style="list-style-type: none"> <li>• Stifle</li> <li>• Thoracic metacarpo-phalangeal</li> <li>• Pelvic metacarpo-phalangeal</li> </ul> <p>Coronary periople (thoracic &amp; pelvic)<br/>           Deep digital flexor tendon (thoracic &amp; pelvic)<br/>           Superficial digital flexor tendon (thoracic &amp; pelvic)<br/>           Suspensory ligament (thoracic &amp; pelvic)<br/>           Gluteal muscle<br/>           Longissimus dorsi muscle*<br/>           Sacrocaudalis lateralis muscle<br/>           3<sup>rd</sup> Metacarpal/tarsal diaphysis<br/>           Rib bone marrow<br/>           Femur bone marrow<br/>           Sesamoid</p> <p><u>Integument</u><br/>           Coronary periople (thoracic &amp; pelvic)<br/>           Lamina (thoracic* &amp; pelvic)<br/>           Hoof wall (thoracic &amp; pelvic)<br/>           Neck skin<br/>           Unpigmented skin<br/>           Dorsum skin<br/>           Gluteal adipose tissue*<br/>           Abdominal adipose tissue<br/>           Loin adipose tissue</p> | <p><u>Cardiovascular</u><br/>           Left atrium free wall<br/>           Left ventricle free wall*<br/>           Right atrium free wall<br/>           Right ventricle free wall<br/>           Aortic valve<br/>           Mitral valve<br/>           Pulmonic valve<br/>           Tricuspid valve</p> <p><u>Respiratory</u><br/>           Trachea<br/>           Larynx<br/>           Cricothyroid dorsalis<br/>           Left lung*<br/>           Mediastinal/bronchiol lymph node*<br/>           Epiglottis</p> <p><u>Endocrine</u><br/>           Thyroid<br/>           Adrenal cortex (left &amp; right)<br/>           Adrenal medulla (left &amp; right)<br/>           Pancreas</p> <p><u>Urogenital</u><br/>           Kidney cortex (left* &amp; right)<br/>           Kidney medulla (left &amp; right)<br/>           Urinary bladder<br/>           Testis (left &amp; right)<br/>           Right epididymis</p> <ul style="list-style-type: none"> <li>• Caput</li> <li>• Cauda</li> <li>• Corpus</li> </ul> <p>Bulbourethral gland<br/>           Prostate<br/>           Seminal vesicle<br/>           Ampulla<br/>           Ductus deferens<br/>           Corpus spongiosum<br/>           Corpus cavernosum</p> | <p><u>Gastrointestinal</u><br/>           Liver (left lobe)*<br/>           Spleen*<br/>           Tongue<br/>           Esophagus<br/>           Stomach<br/>           Duodenum<br/>           Jejunum*<br/>           Ileum<br/>           Cecum<br/>           Right dorsal colon*<br/>           Right ventral colon<br/>           Left dorsal colon<br/>           Left ventral colon<br/>           Small colon</p> <p><u>Nervous System</u><br/>           Dur mater<br/>           Parietal cortex*<br/>           Occipital cortex<br/>           Frontal cortex<br/>           Temporal cortex<br/>           Corpus callosum<br/>           Thalamus<br/>           Hypothalamus<br/>           Pituitary<br/>           Pons<br/>           Cerebellar vermis<br/>           Cerebellum lateral hemisphere*<br/>           Spinal cord</p> <ul style="list-style-type: none"> <li>• C1</li> <li>• C6</li> <li>• T1*</li> <li>• T8</li> </ul> <p>Sciatic nerve</p> <p><u>Eye</u><br/>           Cornea<br/>           Retina<br/>           Iris</p> |
|-------------------------------------------------------------------------------------------------------------------------------------------------------------------------------------------------------------------------------------------------------------------------------------------------------------------------------------------------------------------------------------------------------------------------------------------------------------------------------------------------------------------------------------------------------------------------------------------------------------------------------------------------------------------------------------------------------------------------------------------------------------------------------------------------------------------------------------------------------------------------------------------------------------------------------------------------------------------------------------------------------------------------------------------------------------------------------------------------------------------------|-----------------------------------------------------------------------------------------------------------------------------------------------------------------------------------------------------------------------------------------------------------------------------------------------------------------------------------------------------------------------------------------------------------------------------------------------------------------------------------------------------------------------------------------------------------------------------------------------------------------------------------------------------------------------------------------------------------------------------------------------------------------------------------------------------------------------------------------------------------------------------------------------------------------------------------------------------------------------------------------------------------------------------------------------------------------------------------------------------------------------------------------------------------------------------------------------------------------------------------------------------|-------------------------------------------------------------------------------------------------------------------------------------------------------------------------------------------------------------------------------------------------------------------------------------------------------------------------------------------------------------------------------------------------------------------------------------------------------------------------------------------------------------------------------------------------------------------------------------------------------------------------------------------------------------------------------------------------------------------------------------------------------------------------------------------------------------------------------------------------------------------------------------------------------------------------------------------------------------------------------------------------------------------------------------------------------------------|

**Table S2: Histopathology findings for two adult Thoroughbred stallions.**

Acronyms: no significant findings (NSF), pelvic limb (PL), thoracic limb (TL), cervical (C), thoracic (T), lumbar (L)

| Tissue                                        | ECA_UCD_AH3                                                                                                  | ECA_UCD_AH4                                                                                            |
|-----------------------------------------------|--------------------------------------------------------------------------------------------------------------|--------------------------------------------------------------------------------------------------------|
| Skin Mid Neck                                 | NSF                                                                                                          | NSF                                                                                                    |
| Skin Dorsum                                   | NSF                                                                                                          | NSF                                                                                                    |
| Gluteal Adipose                               | NSF                                                                                                          | NSF                                                                                                    |
| Gluteal Muscle                                | NSF                                                                                                          | NSF                                                                                                    |
| Sacrocaudalis Muscle                          | NSF                                                                                                          | NSF                                                                                                    |
| Longissimus Dorsi Muscle                      | NSF                                                                                                          | NSF                                                                                                    |
| Right TL coronary band                        | NSF                                                                                                          | NSF                                                                                                    |
| Right TL & PL Lamina                          | NSF                                                                                                          | NSF                                                                                                    |
| Right PL suspensory lig.                      | NSF                                                                                                          | NSF                                                                                                    |
| Right PL Superficial Digital Flexor Tendon    | NSF                                                                                                          | NSF                                                                                                    |
| Left TL & Right PL Deep Digital Flexor Tendon | NSF                                                                                                          | NSF                                                                                                    |
| Sciatic Nerve                                 | NSF                                                                                                          |                                                                                                        |
| Liver                                         | Increased bile ducts/oval cells; mild lymphocytic portal infiltrates;                                        | Rare centrolobular and peripherolobular undefined round cell infiltrate and focal subcapsular fibrosis |
| Spleen                                        | Active white pulp                                                                                            | NSF                                                                                                    |
| Adrenal Cortex & Medulla                      | Markedly folded cortex; multifocal; vacuolar change of cortical cells                                        | NSF                                                                                                    |
| Kidney Cortex                                 | NSF                                                                                                          | NSF                                                                                                    |
| Kidney Medulla                                | Mild lymphocytic infiltration                                                                                | Mild lymphocytic infiltration                                                                          |
| Larynx                                        | NSF                                                                                                          | Mild subepithelial lymphoplasmocytic infiltrate                                                        |
| Cricothyroid Dorsalis Muscle                  | Minimal interstitial lymphocytes                                                                             | NSF                                                                                                    |
| Pancreas                                      | Sub capsular fibrosis                                                                                        | NSF                                                                                                    |
| Thyroid                                       | NSF                                                                                                          | NSF                                                                                                    |
| Mesenteric Lymph node                         | Marked cortical (active follicles) and paracortical hyperplasia                                              | Cortical and paracortical hyperplasia                                                                  |
| Tracheobronchial Lymph Node                   | Marked cortical (active follicles) and paracortical hyperplasia                                              | Cortical and paracortical hyperplasia                                                                  |
| Left Lung                                     | Multifocal fibrosis with mild lymphoplasmacellular infiltrates, contracted bronchi with lymphoid infiltrates | Perivascular lymphoid infiltrate; contracted bronchioles                                               |
| Heart Left Atrium                             | NSF                                                                                                          | Focal perivascular lymphoid myocarditis                                                                |
| Heart Left Ventricle                          | NSF; 4cm                                                                                                     | Small aggregates of undefined round cells; 4.2cm                                                       |
| Heart Right Atrium                            | NSF                                                                                                          | NSF                                                                                                    |
| Heart Right Ventricle                         | NSF; 4.2cm                                                                                                   | Perivascular and interstitial lymph-plasmacytic infiltrate in coronary fat/epicardium; 5.2cm           |
| Ventricular septum                            | NSF; 4.1xm                                                                                                   | NSF; 4.5cm                                                                                             |
| Mitral Valve                                  | NSF                                                                                                          | NSF                                                                                                    |
| Tricuspid Valve                               | NSF                                                                                                          | NSF                                                                                                    |
| Aortic Valve                                  | NSF                                                                                                          | NSF                                                                                                    |
| Pulmonic Valve                                | NSF                                                                                                          | NSF                                                                                                    |
| Trachea                                       | NSF                                                                                                          | NSF                                                                                                    |
| Tongue                                        | Minimal multifocal perivascular lymphocytic glossitis                                                        | Minimal multifocal perivascular lymphocytic glossitis                                                  |
| Epiglottis                                    | Minimal lympho-plasmacellular infiltrates in lamina propria                                                  | NSF                                                                                                    |
| Esophagus                                     | NSF                                                                                                          | NSF                                                                                                    |

|                                    |                                                                                                            |                                                                                                            |
|------------------------------------|------------------------------------------------------------------------------------------------------------|------------------------------------------------------------------------------------------------------------|
| Stomach                            | Lymphocytic gastritis with a lymph follicle formation                                                      | NSF                                                                                                        |
| Duodenum                           | Mild enteritis                                                                                             | Mild enteritis                                                                                             |
| Ileum                              | Mild enteritis                                                                                             | Mild enteritis                                                                                             |
| Cecum                              | Lympho-plasmacytic and eosinophilic inflammation with prominent lymphoid tissue and lymphocytic exocytosis | Lympho-plasmacytic and eosinophilic inflammation with prominent lymphoid tissue and lymphocytic exocytosis |
| Right Ventral Colon                | Lympho-plasmacytic and eosinophilic inflammation with prominent lymphoid tissue and lymphocytic exocytosis | Lympho-plasmacytic and eosinophilic inflammation with prominent lymphoid tissue and lymphocytic exocytosis |
| Left Ventral Colon                 | Lympho-plasmacytic and eosinophilic inflammation with prominent lymphoid tissue and lymphocytic exocytosis | Lympho-plasmacytic and eosinophilic inflammation with prominent lymphoid tissue and lymphocytic exocytosis |
| Left Dorsal Colon                  | Lympho-plasmacytic and eosinophilic inflammation with prominent lymphoid tissue and lymphocytic exocytosis | Lympho-plasmacytic and eosinophilic inflammation with prominent lymphoid tissue and lymphocytic exocytosis |
| Right Dorsal Colon                 | Lympho-plasmacytic and eosinophilic inflammation with prominent lymphoid tissue and lymphocytic exocytosis | Lympho-plasmacytic and eosinophilic inflammation with prominent lymphoid tissue and lymphocytic exocytosis |
| Small Colon                        | NSF                                                                                                        | NSF                                                                                                        |
| Eye (retina, cornea, iris, sclera) | NSF; retina missing                                                                                        | NSF                                                                                                        |
| Frontal Cortex                     | NSF                                                                                                        | Solitary perivascular lymphoid cuff                                                                        |
| Occipital Cortex                   | NSF                                                                                                        | NSF                                                                                                        |
| Parietal Cortex                    | NSF                                                                                                        | NSF                                                                                                        |
| Temporal cortex                    | NSF                                                                                                        | Perivascular lymphoid cuff                                                                                 |
| Pituitary                          | NSF                                                                                                        | NSF                                                                                                        |
| Cerebellum Vermis                  | NSF                                                                                                        | NSF                                                                                                        |
| Cerebellum lateral hemisphere      | NSF                                                                                                        | NSF                                                                                                        |
| Pons                               | NSF                                                                                                        | Perivascular lymphoid cuff                                                                                 |
| Thalamus                           | NSF                                                                                                        | NSF                                                                                                        |
| Hypothalamus                       | NSF                                                                                                        | Focal meningeal lymphoid infiltrate                                                                        |
| Dura Mater                         | NSF                                                                                                        | NSF                                                                                                        |
| Corpus Callosum                    | NSF                                                                                                        | NSF                                                                                                        |
| Spinal Cord C1                     | NSF                                                                                                        | NSF                                                                                                        |
| Spinal Cord C6                     | NSF                                                                                                        | NSF                                                                                                        |
| Spinal Cord T8                     | NSF                                                                                                        | NSF                                                                                                        |
| Spinal Cord L1                     | NSF                                                                                                        | NSF                                                                                                        |
| Spinal Cord L6                     | NSF                                                                                                        | NSF                                                                                                        |
| Dorsal Root Ganglia C4/5           | NSF                                                                                                        | NSF                                                                                                        |
| Dorsal Root Ganglia T9/10          | NSF                                                                                                        | NSF                                                                                                        |
| Urinary Bladder                    | NSF                                                                                                        | NSF                                                                                                        |
| Urethra                            | NSF                                                                                                        | NSF                                                                                                        |
| Prostate                           | NSF                                                                                                        | NSF                                                                                                        |
| Right Testicle                     | NSF; spermatogenesis present                                                                               | NSF; spermatogenesis present                                                                               |
| Left Testicle                      | NSF; spermatogenesis present                                                                               | NSF; spermatogenesis present                                                                               |

|                                    |                                       |                                              |
|------------------------------------|---------------------------------------|----------------------------------------------|
| Right caput epididymis             |                                       | NSF                                          |
| Right cauda epididymis             | lymphocytic perivascular epididymitis | NSF                                          |
| Right corpus epididymis            | NSF                                   | Minimal interstitial lymphocytic infiltrates |
| Seminal vesicle                    | NSF                                   | NSF                                          |
| Bulbourethral gland                | NSF                                   | NSF                                          |
| Ampulla                            | NSF                                   | NSF                                          |
| Ductus deferens                    | NSF                                   | NSF                                          |
| Urethral process/corpus spongiosum | NSF                                   | Lymphocytic balanitis                        |
| Body of penis/corpus cavernosum    | NSF                                   | NSF                                          |
| Metacarpal III                     | NSF                                   | NSF                                          |
| Sesamoid                           | NSF                                   | NSF                                          |

**Table S3. a- and b- wave amplitudes and implicit times for scotopic electroretinography waveforms of two Thoroughbred stallions**

|         | Horse              | ECA_UCD_AH3                                   |       |       |       |       |       | ECA_UCD_AH4 |       |       |       |       |       |    |  |
|---------|--------------------|-----------------------------------------------|-------|-------|-------|-------|-------|-------------|-------|-------|-------|-------|-------|----|--|
|         |                    | Flash stimulus (cd.s/m <sup>2</sup> ) - white |       | 0.01  |       | 3     |       | 10          |       | 0.01  |       | 3     |       | 10 |  |
|         |                    | Eye                                           | OD    | OS    | OD    | OS    | OD    | OS          | OD    | OS    | OD    | OS    | OD    | OS |  |
| a- Wave | amplitude (uV)     | 16.7                                          | 9.0   | 29.2  | 91.4  | 17.2  | 151.0 | 5.8         | 4.5   | 144.0 | 110.1 | 189.3 | 136.0 |    |  |
|         | implicit time (ms) | 12.8                                          | 16.4  | 12.8  | 11.8  | 6.7   | 10.8  | 22.5        | 14.5  | 14.1  | 14.6  | 13.8  | 14.6  |    |  |
| b- Wave | amplitude (uV)     | 230.8                                         | 186.8 | 358.1 | 200.8 | 614.0 | 375.8 | 245.6       | 305.7 | 364.8 | 498.1 | 411.4 | 444.7 |    |  |
|         | implicit time (ms) | 83.5                                          | 91.6  | 38.9  | 35.3  | 69.6  | 65.5  | 76.8        | 67.8  | 57.7  | 58.5  | 61.4  | 59.2  |    |  |

**Table S4: Epididymal sperm post-thaw analysis for two adult Thoroughbred stallions**

|                            | ECA_UCD_AH3 | ECA_UCD_AH4 |
|----------------------------|-------------|-------------|
| Concentration (million/ml) | 323.3       | 455.5       |
| Number of straws           |             |             |
| Rapid progressive%         | 39.11       | 52.75       |
| Slow progressive%          | 0.0         | 0.0         |
| Non-progressive%           | 9.43        | 13.34       |
| Immotile%                  | 51.46       | 33.91       |
| VCL (µm/sec)               | 110.2       | 100.5       |
| VAP (µm/sec)               | 56.75       | 51.16       |
| VSL(µm/sec)                | 43.03       | 36.59       |
| LIN                        | 0.39        | 0.36        |
| STR                        | 0.75        | 0.71        |
| BCF (hertz)                | 26.23       | 22.58       |
| ALH (µm)                   | 4.28        | 4.49        |

| <b>Table S5: Synovial fluid analysis for two adult Thoroughbred stallions</b> |                              |                              |                              |                              |                              |                              |
|-------------------------------------------------------------------------------|------------------------------|------------------------------|------------------------------|------------------------------|------------------------------|------------------------------|
|                                                                               | ECA_UCD_AH3                  |                              |                              | ECA_UCD_AH4                  |                              |                              |
|                                                                               | Left tarso-crural            | Right middle carpal          | Right radio carpal           | Left tarso-crural            | Left middle carpal           | Left radio carpal            |
| Gross appearance                                                              | Yellow/slight haze           | Yellow/clear                 | Yellow/hazy                  | Yellow/clear                 | Yellow/hazy                  | Yellow/clear                 |
| Total protein (g/dL)                                                          | 1.2                          | 1.5                          | 1.5                          | 1.2                          | 2.1                          | 1.7                          |
| Mucin clot                                                                    | Very good                    | Very good                    | Very good                    | Very good                    | Very good                    | Very good                    |
| Total RBC's (/μL)                                                             | <30,000                      | <30,000                      | <30,000                      | Rare                         | Rare                         | Rare                         |
| Total nucleated cells (/μL)                                                   | 180                          | 150                          | 180                          | NA                           | NA                           | NA                           |
| Neutrophil %                                                                  | 0                            | 1                            | 2                            | 0                            | 1                            | 0                            |
| Small mononuclear%                                                            | 85                           | 77                           | 63                           | 72                           | 78                           | 60                           |
| Large mononuclear%                                                            | 15                           | 22                           | 35                           | 28                           | 21                           | 40                           |
| Eosinophil%                                                                   | 0                            | 0                            | 0                            | 0                            | 0                            | 0                            |
| Interpretation                                                                | No cytological abnormalities | No cytological abnormalities | No cytological abnormalities | No cytological abnormalities | No cytological abnormalities | No cytological abnormalities |

| <b>Table S6: Cerebrospinal fluid analysis for two adult Thoroughbred stallions</b> |                              |                              |
|------------------------------------------------------------------------------------|------------------------------|------------------------------|
|                                                                                    | ECA_UCD_AH3                  | ECA_UCD_AH4                  |
| Gross appearance                                                                   | Clear                        | Clear                        |
| Total protein (mg/dL)                                                              | 72                           | 88                           |
| Total RBC's (/μL)                                                                  | 6                            | <1                           |
| Total nucleated cells (/μL)                                                        | 3                            | 1                            |
| Neutrophil %                                                                       | 0                            | 0                            |
| Small mononuclear%                                                                 | 95                           | 85                           |
| Large mononuclear%                                                                 | 5                            | 15                           |
| Eosinophil%                                                                        | 0                            | 0                            |
| Interpretation                                                                     | No cytological abnormalities | No cytological abnormalities |

| <b>Table S7. Runs of homozygosity (ROH) and inbreeding estimate (F<sub>ROH</sub>) for combined mare and stallion FAANG genome data sets</b> |             |             |             |             |
|---------------------------------------------------------------------------------------------------------------------------------------------|-------------|-------------|-------------|-------------|
| Length of ROH (Mb)                                                                                                                          | ECA_UCD_AH1 | ECA_UCD_AH2 | ECA_UCD_AH3 | ECA_UCD_AH4 |
| 0 to 4                                                                                                                                      | 466         | 462         | 453         | 220         |
| 4 to 8                                                                                                                                      | 24          | 26          | 38          | 29          |
| 8 to 16                                                                                                                                     | 7           | 11          | 6           | 16          |

|                  |           |           |           |            |
|------------------|-----------|-----------|-----------|------------|
| 16 to 32         | 3         | 4         | 1         | 11         |
| > 32             | 0         | 0         | 0         | 4          |
| ROH Genome       | 765915572 | 838359933 | 758961216 | 1009849409 |
| F <sub>ROH</sub> | 0.336     | 0.368     | 0.333     | 0.444      |

**Table S8. Microsatellite genotyping of cryopreserved fibroblast cell line DNA from two adult Thoroughbred stallions compared to whole blood derived genomic DNA**

| Locus        | Type        |             |             |             |
|--------------|-------------|-------------|-------------|-------------|
|              | Whole Blood |             | Fibroblast  |             |
|              | ECA_UCD_AH3 | ECA_UCD_AH3 | ECA_UCD_AH4 | ECA_UCD_AH4 |
| <i>AHT4</i>  | JK          | JK          | K           | K           |
| <i>AME</i>   | YX          | YX          | YX          | YX          |
| <i>ASB2</i>  | N           | N           | O           | O           |
| <i>HMS3</i>  | I           | I           | MP          | MP          |
| <i>HMS7</i>  | M           | M           | LM          | LM          |
| <i>HTG4</i>  | K           | K           | KM          | KM          |
| <i>LEX33</i> | MQ          | MQ          | Q           | Q           |
| <i>HMS2</i>  | L           | L           | L           | L           |
| <i>AHT5</i>  | J           | J           | KN          | KN          |
| <i>ASB17</i> | GM          | GM          | NR          | NR          |
| <i>ASB23</i> | J           | J           | J           | J           |
| <i>HMS6</i>  | MP          | MP          | MP          | MP          |
| <i>HTG10</i> | IO          | IO          | R           | R           |
| <i>LEX3</i>  | H           | H           | N           | N           |
| <i>VHL20</i> | I           | I           | IL          | IL          |

**Table S9. Color genotyping for two adult Thoroughbred stallions**

|                                     | ECA_UCD_AH3 | ECA_UCD_AH4 |
|-------------------------------------|-------------|-------------|
| Red Factor                          | E/e         | E/e         |
| Agouti                              | A/a         | A/a         |
| Cream                               | N/N         | N/N         |
| Pearl                               | N/N         | N/N         |
| Silver                              | N/N         | N/N         |
| Dun                                 | nd2/nd2     | nd2/nd2     |
| Champagne                           | N/N         | N/N         |
| Lethal White Overo                  | N/N         | N/N         |
| Sabino 1                            | N/N         | N/N         |
| Dominant White (W5, W10, W20, W22)  | N/W20       | W20/W20     |
| Splashed White (SW1, SW3, SW5, SW6) | N/N         | N/N         |
| Splashed White (SW2, SW4)           | N/N         | N/N         |
| Tobiano                             | N/N         | N/N         |
| Leopard                             | N/N         | N/N         |
| Patern-1                            | N/N         | N/N         |
| Gray                                | N/N         | N/G         |
